# Supplementary material for: A Cell Culture Approach to Optimized Human Corneal Endothelial Cell Function
Source: PubMed Central journal article supplement — Invest Ophthalmol Vis Sci. 2018 Mar;59(3):1617–29. doi: 10.1167/iovs.17-23637 (PMC5869002; doi:10.1167/iovs.17-23637), 2018-03
Supplement: iovs-59-02-46_s01.pdf [file iovs-59-02-46_s01.pdf]

**Supplemental Table 1 – Description of donor corneas**

| Cornea ID    | Donor age | Cause of death              | Specular cell count/mm <sup>2</sup> |
|--------------|-----------|-----------------------------|-------------------------------------|
| 228385OD     | 17        | Motor vehicle accident      | 2890                                |
| 228385OS     | 17        | Motor vehicle accident      | 2817                                |
| 228330OD     | 10        | Asthma                      | 3378                                |
| 229096OD     | 44        | Sudden cardiac death        | 2976                                |
| 228939OS     | 44        | Intracranial hemorrhage     | 2778                                |
| 228833OS     | 49        | Myocardial infarction       | 3021                                |
| 228824OS     | 14        | Undetermined                | 3663                                |
| 229162OD     | 16        | Undetermined                | 2985                                |
| 229297OD     | 21        | Undetermined                | 2463                                |
| 2013031639OD |           |                             |                                     |
| 6238OD       | 34        | Acute cardiac crisis        | 2833                                |
| 6238OS       | 34        | Acute cardiac crisis        | 2762                                |
| 1272710OD    | 20        | Motor vehicle accident      | 3185                                |
| 1272710OS    | 20        | Motor vehicle accident      | 3067                                |
| 221285OS     | 17        | Cardiac arrest              | 3247                                |
| 221285OD     | 17        | Cardiac arrest              | 3367                                |
| 2013115928OS | 27        | Blunt traumatic injuries    | 3040                                |
| 227774OS     | 18        | Probable drug overdose      | 3012                                |
| 127672OS     | 70        | Blunt force trauma          | 2890                                |
| 127672OD     | 70        | Blunt force trauma          | 2994                                |
| C1407041OS   | 23        | Hypoxic brain injury        | 3137                                |
| C1407042OD   | 23        | Hypoxic brain injury        | 3017                                |
| 216175OS     | 65        | Myocardial infarction       | 2475                                |
| 217432OD     | 30        | Undetermined                | 3185                                |
| 217432OS     | 30        | Undetermined                | 2941                                |
| 228939OS     | 44        | Intracranial hemorrhage     | 2778                                |
| 229575OD     | 29        | Anoxic encephalopathy       | 2667                                |
| 229162OD     | 16        | Gunshot wound to head       | 2985                                |
| 229200OS     | 25        | Gunshot wound to head       | 2924                                |
| 230277OS     | 26        | Cerebral aneurysm           | 2882                                |
| 230277OD     | 26        | Cerebral aneurysm           | 3155                                |
| 230309OS     | 24        | Anoxia                      | 3195                                |
| 229946OD     | 47        | Acute myocardial infarction | 2801                                |
| 222119OD     | 34        | Multisystem organ failure   | 2778                                |
| 222067OS     | 38        | Hypoxic encephalopathy      | 3115                                |
| 240031OS     | 18        | Intracranial hemorrhage     | 2646                                |
